# Supplementary material for: Experimental and theoretical investigations of functionalized boron nitride as electrode materials for Li-ion batteries
Source: Royal Society of Chemistry journal article supplement (doi:10.1039/c6ra03141b), 2016-01-01
Supplement: c6ra03141b1.pdf [file c6ra03141b1.pdf]

## Experimental and Theoretical Investigations of Functionalized Boron Nitride as Electrode Materials for Li-ion Batteries

Fan Zhang<sup>1</sup>, Károly Németh<sup>\*2</sup>, Javier Bareño<sup>3</sup>, Fulya Dogan<sup>3</sup>, Ira D. Bloom<sup>3</sup>, Leon L. Shaw<sup>\*1</sup>

<sup>1</sup> Mechanical, Materials and Aerospace Engineering Department, Illinois Institute of Technology, Chicago, IL 60616-3793; Email: [fzhang27@hawk.iit.edu](mailto:fzhang27@hawk.iit.edu) (Fan Zhang); [lshaw2@iit.edu](mailto:lshaw2@iit.edu) (Leon L. Shaw)

<sup>2</sup> Department of Physics, Illinois Institute of Technology, Chicago, IL 60616-3793; Email: [nemeth@agni.phys.iit.edu](mailto:nemeth@agni.phys.iit.edu) (Károly Németh)

<sup>3</sup> Chemical Sciences and Engineering Division, Argonne National Laboratory, Argonne, IL 60439; Email: [bareno@anl.gov](mailto:bareno@anl.gov) (Javier Bareño); [fdogan@anl.gov](mailto:fdogan@anl.gov) (Fulya Dogan); [ira.bloom@anl.gov](mailto:ira.bloom@anl.gov) (Ira D. Bloom)

### Supporting Materials

**Table S1:** EDS analysis of the residual of activated carbon after heating at 850 °C in air\*

| Element     | Atomic% |        |        |        |
|-------------|---------|--------|--------|--------|
|             | Spot 1  | Spot 2 | Spot 3 | Spot 4 |
| <b>O K</b>  | 60.14   | 61.14  | 63.57  | 62.95  |
| <b>Mg K</b> | 1.70    | 1.67   | 2.10   | 2.10   |
| <b>Al K</b> | 4.14    | 3.73   | 3.54   | 3.86   |
| <b>Si K</b> | 16.18   | 18.46  | 15.07  | 16.45  |
| <b>K K</b>  | 3.64    | 2.95   | 2.93   | 3.08   |
| <b>Ca K</b> | 8.35    | 7.74   | 7.30   | 7.36   |
| <b>Mn K</b> | 0.34    | 3.87   | -      | 0.28   |
| <b>Fe K</b> | 4.20    | 0.44   | 3.45   | 3.91   |
| <b>Au M</b> | 1.30    | -      | 1.07   | -      |

\* The spots refer to where the EDS data is collected and are randomly chosen from the SEM image.
